# Supplementary material for: Life-expectancy changes during the COVID-19 pandemic from 2019–2021: estimates from Japan, a country with low pandemic impact
Source: PeerJ journal article supplement (doi:10.7717/peerj.15784), 2023-08-16

(A)

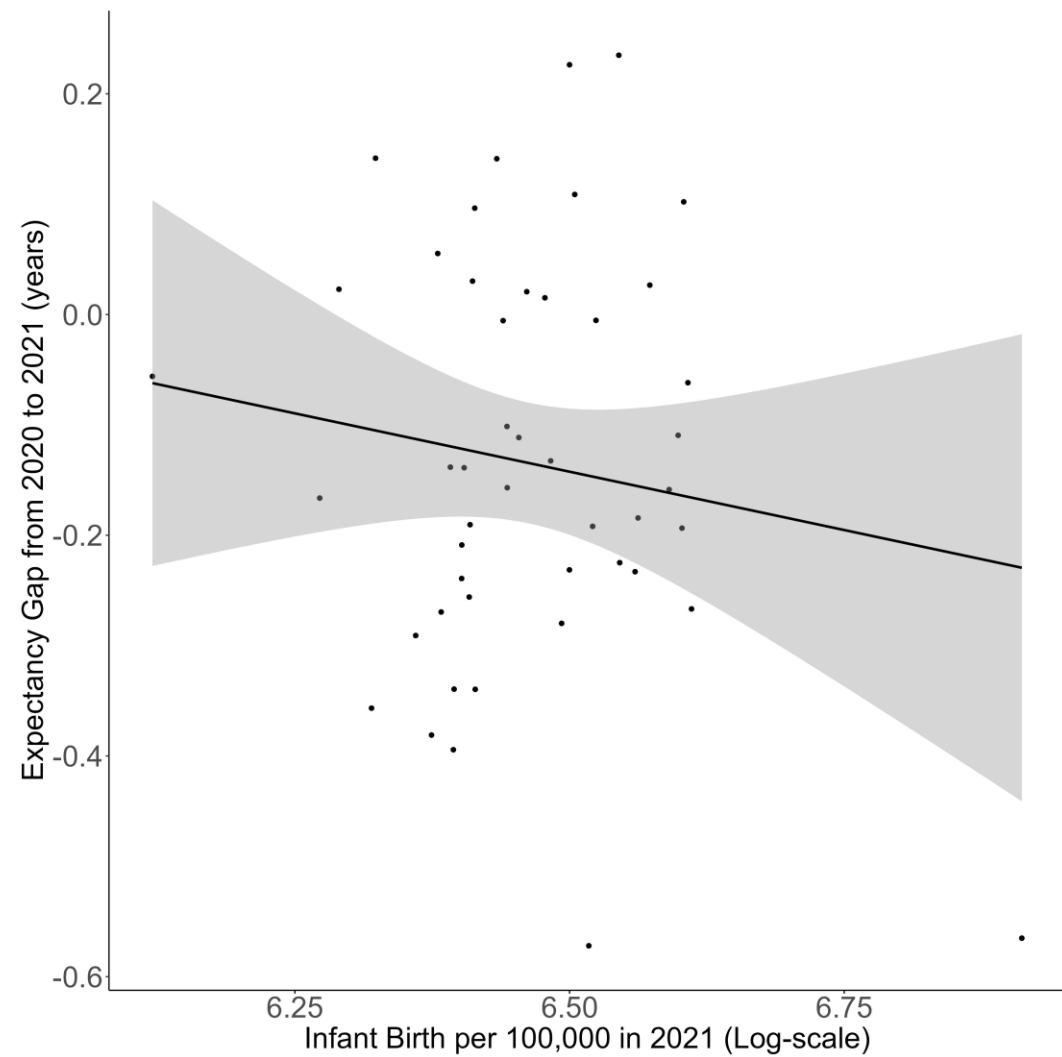

(B)

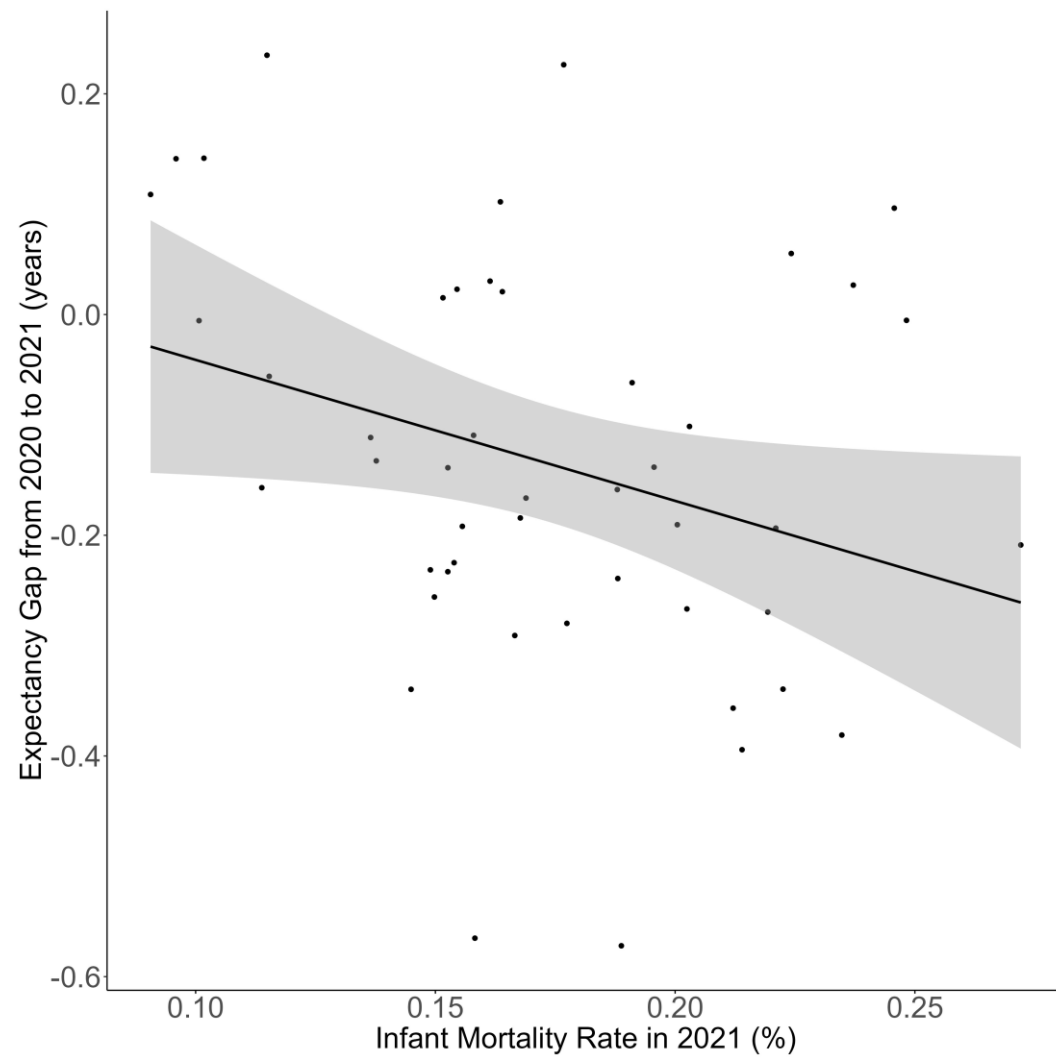

Supplement: FigS2.pdf [file FigS2.pdf]
