# Supplementary material for: Life-expectancy changes during the COVID-19 pandemic from 2019–2021: estimates from Japan, a country with low pandemic impact
Source: PeerJ. 2023 Aug 16;11:e15784. doi: 10.7717/peerj.15784 (PMC10439719; doi:10.7717/peerj.15784)
Supplement: Supplemental Information 4 [file peerj-11-15784-s004.xlsx]

## Sheet: Table.S1.lft2021.total
Table S1: Life table Total 2021
Age	Death	ETR	mx	ax	w	qx	lx	dx	Lx	Tx	Ex
0	1399.43	803653	0.00174134	0.22	1	0.00173898	100000	173.898	99864.4	8.45844e+06	84.5844
1-4	484.14	3.5364e+06	0.000136902	1.52	4	0.000547421	99826.1	54.647	399169	8.35858e+06	83.7314
5-9	330.1	4.97908e+06	6.62974e-05	2.35	5	0.000331429	99771.5	33.0671	498770	7.95941e+06	79.7764
10-14	441.12	5.29978e+06	8.32336e-05	2.93	5	0.000416096	99738.4	41.5008	498606	7.46064e+06	74.8021
15-19	1204.41	5.53726e+06	0.00021751	2.8	5	0.00108703	99696.9	108.374	498246	6.96204e+06	69.832
20-24	2183.75	5.90682e+06	0.0003697	2.54	5	0.00184682	99588.5	183.922	497490	6.46379e+06	64.905
25-29	2322.78	5.94584e+06	0.000390656	2.55	5	0.00195141	99404.6	193.98	496548	5.9663e+06	60.0204
30-34	2863.94	6.24321e+06	0.000458729	2.63	5	0.00229115	99210.6	227.307	495514	5.46975e+06	55.1327
35-39	4294.43	7.12589e+06	0.000602652	2.63	5	0.00300896	98983.3	297.837	494211	4.97424e+06	50.2533
40-44	7156.33	8.02971e+06	0.000891232	2.67	5	0.00444692	98685.5	438.847	492405	4.48003e+06	45.397
45-49	13681.6	9.57939e+06	0.00142823	2.71	5	0.00711786	98246.6	699.306	489632	3.98762e+06	40.5879
50-54	20955	8.90684e+06	0.00235269	2.68	5	0.0116996	97547.3	1141.26	485089	3.49799e+06	35.8594
55-59	27804.5	7.74171e+06	0.00359153	2.65	5	0.0178073	96406.1	1716.73	477996	3.0129e+06	31.2522
60-64	40108	7.30433e+06	0.00549099	2.67	5	0.0271081	94689.3	2566.85	467466	2.5349e+06	26.7708
65-69	69550.4	7.86703e+06	0.00884074	2.68	5	0.0433153	92122.5	3990.31	451355	2.06744e+06	22.4423
70-74	135863	9.52005e+06	0.0142713	2.67	5	0.06906	88132.2	6086.4	426479	1.61608e+06	18.3371
75-79	158924	6.79926e+06	0.0233738	2.69	5	0.110882	82045.8	9097.39	389214	1.1896e+06	14.4993
80-84	225257	5.50739e+06	0.0409008	2.66	5	0.186641	72948.4	13615.2	332882	800391	10.972
85-89	292449	3.81903e+06	0.0765768	2.6	5	0.323441	59333.2	19190.8	250608	467509	7.87938
90-94	264250	1.84563e+06	0.143176	2.44	5	0.523866	40142.4	21029.3	146877	216900	5.40327
95-99	134064	551614	0.243039	2.21	5	0.724159	19113.2	13841	56949.5	70023.2	3.66361
100-104	31065.9	80194.4	0.387382	1.87	5	0.875437	5272.19	4615.47	11914.5	13073.7	2.47975
105-109	3091.53	5518.31	0.560231	1.52	5	0.949672	656.719	623.668	1113.23	1159.17	1.7651
110+	111.01	159.62	0.695464	1.39	1	1	33.0515	33.0515	45.9416	45.9416	1.39

## Sheet: Table.S2.lft2020.total
Table S2: Life table Total 2020
Age	Death	ETR	mx	ax	w	qx	lx	dx	Lx	Tx	Ex
0	1512.49	837124	0.00180677	0.22	1	0.00180423	100000	180.423	99859.3	8.47338e+06	84.7338
1-4	467.16	3.68071e+06	0.000126921	1.55	4	0.000507527	99819.6	50.6611	399154	8.37352e+06	83.8866
5-9	306.1	5.04728e+06	6.06466e-05	2.43	5	0.000303186	99768.9	30.2485	498767	7.97437e+06	79.9284
10-14	426.12	5.31395e+06	8.0189e-05	2.86	5	0.000400876	99738.7	39.9829	498608	7.4756e+06	74.9519
15-19	1262.46	5.6522e+06	0.000223357	2.84	5	0.00111625	99698.7	111.288	498253	6.97699e+06	69.9808
20-24	2180.8	5.92085e+06	0.000368325	2.57	5	0.00183998	99587.4	183.239	497492	6.47874e+06	65.0558
25-29	2248.81	5.94617e+06	0.000378194	2.52	5	0.0018892	99404.2	187.794	496555	5.98125e+06	60.171
30-34	2903.07	6.40739e+06	0.000453082	2.65	5	0.002263	99216.4	224.527	495554	5.48469e+06	55.2801
35-39	4397.58	7.26341e+06	0.000605443	2.61	5	0.00302284	98991.8	299.237	494244	4.98914e+06	50.3995
40-44	7680.73	8.33088e+06	0.000921959	2.66	5	0.00459987	98692.6	453.973	492401	4.4949e+06	45.5444
45-49	14116	9.68148e+06	0.00145804	2.67	5	0.00726553	98238.6	713.755	489530	4.00249e+06	40.7426
50-54	19819.1	8.53158e+06	0.00232303	2.66	5	0.0115523	97524.9	1126.64	484988	3.51296e+06	36.0212
55-59	27531.1	7.7478e+06	0.00355341	2.66	5	0.0176205	96398.2	1698.59	478016	3.02798e+06	31.4111
60-64	40529.2	7.36367e+06	0.00550395	2.68	5	0.0271728	94699.6	2573.25	467528	2.54996e+06	26.9268
65-69	72997.6	8.26974e+06	0.00882707	2.68	5	0.0432496	92126.4	3984.43	451388	2.08243e+06	22.6041
70-74	124145	9.08226e+06	0.013669	2.63	5	0.0662004	88142	5835.03	426881	1.63104e+06	18.5047
75-79	162194	7.04496e+06	0.0230228	2.65	5	0.109205	82306.9	8988.37	390412	1.20416e+06	14.6302
80-84	216600	5.35492e+06	0.0404487	2.67	5	0.184825	73318.6	13551.1	335019	813751	11.0988
85-89	276593	3.67905e+06	0.0751806	2.61	5	0.318648	59767.5	19044.8	253320	478732	8.00991
90-94	245283	1.7717e+06	0.138445	2.45	5	0.511609	40722.7	20834.1	150487	225412	5.53529
95-99	119406	509422	0.234395	2.23	5	0.710601	19888.6	14132.9	60295	74925.2	3.76725
100-104	27306.5	72268.7	0.377847	1.89	5	0.868572	5755.73	4999.27	13230.9	14630.3	2.54186
105-109	2751.51	5170.07	0.5322	1.54	5	0.936506	756.464	708.433	1331.14	1399.35	1.84985
110+	97	136.9	0.708546	1.42	1	1	48.0309	48.0309	68.2039	68.2039	1.42

## Sheet: Table.S3.lft2019.total
Table S3: Life table Total 2019
Age	Death	ETR	mx	ax	w	qx	lx	dx	Lx	Tx	Ex
0	1654.6	882774	0.00187432	0.22	1	0.00187158	100000	187.158	99854	8.44904e+06	84.4904
1-4	665.23	3.80402e+06	0.000174875	1.55	4	0.000699202	99812.8	69.7894	399080	8.34919e+06	83.6484
5-9	379.11	5.10109e+06	7.43195e-05	2.37	5	0.000371525	99743.1	37.057	498618	7.95011e+06	79.7059
10-14	426.12	5.3337e+06	7.9892e-05	2.78	5	0.000399389	99706	39.8215	498442	7.45149e+06	74.7346
15-19	1177.51	5.74752e+06	0.000204873	2.85	5	0.00102391	99666.2	102.049	498111	6.95305e+06	69.7634
20-24	2042.83	5.96249e+06	0.000342614	2.52	5	0.00171161	99564.1	170.415	497398	6.45494e+06	64.832
25-29	2055.82	5.93442e+06	0.000346423	2.59	5	0.00173067	99393.7	172.018	496554	5.95754e+06	59.9388
30-34	2979.19	6.59689e+06	0.000451605	2.58	5	0.00225556	99221.7	223.801	495567	5.46099e+06	55.0382
35-39	4478.76	7.40391e+06	0.000604918	2.64	5	0.00302028	98997.9	299.001	494284	4.96542e+06	50.1568
40-44	7816.02	8.66239e+06	0.000902294	2.66	5	0.00450196	98698.9	444.339	492455	4.47114e+06	45.3008
45-49	14029.4	9.62357e+06	0.00145782	2.71	5	0.00726485	98254.6	713.804	489638	3.97868e+06	40.4936
50-54	19552.7	8.3904e+06	0.00233037	2.67	5	0.0115889	97540.7	1130.39	485070	3.48904e+06	35.7701
55-59	27401	7.57499e+06	0.00361729	2.69	5	0.0179366	96410.4	1729.27	478057	3.00397e+06	31.1582
60-64	42162.2	7.46197e+06	0.00565028	2.66	5	0.0278828	94681.1	2639.97	467228	2.52592e+06	26.6781
65-69	79522.6	8.79367e+06	0.00904316	2.68	5	0.0442867	92041.1	4076.19	450749	2.05869e+06	22.367
70-74	118014	8.56166e+06	0.013784	2.65	5	0.0667575	87964.9	5872.32	426025	1.60794e+06	18.2793
75-79	163832	7.07263e+06	0.0231642	2.65	5	0.109842	82092.6	9017.2	389273	1.18191e+06	14.3973
80-84	222416	5.2997e+06	0.0419676	2.67	5	0.191147	73075.4	13968.1	332831	792641	10.8469
85-89	279105	3.54778e+06	0.0786705	2.6	5	0.33088	59107.3	19557.4	248599	459810	7.77925
90-94	245591	1.69172e+06	0.145173	2.44	5	0.529193	39549.9	20929.5	144170	211211	5.34038
95-99	116702	470238	0.248176	2.2	5	0.73213	18620.4	13632.5	54930.8	67041.6	3.60044
100-104	26288.1	66173	0.397263	1.85	5	0.882266	4987.85	4400.61	11077.3	12110.8	2.42807
105-109	2691.59	4794.01	0.561449	1.51	5	0.948567	587.237	557.034	992.137	1033.52	1.75996
110+	110	130.83	0.840786	1.37	1	1	30.2032	30.2032	41.3783	41.3783	1.37

## Sheet: Table.S4.lft2021.male
Age	Death	ETR	mx	ax	w	qx	lx	dx	Lx	Tx	Ex
0	762.34	411317	0.00185341	0.22	1	0.00185074	100000	185.074	99855.6	8.14866e+06	81.4866
1-4	256.12	1.80922e+06	0.000141564	1.5	4	0.000566054	99814.9	56.5007	399118	8.0488e+06	80.6372
5-9	194.1	2.55028e+06	7.61094e-05	2.29	5	0.000380468	99758.4	37.9549	498689	7.64968e+06	76.6821
10-14	244.11	2.71687e+06	8.98497e-05	2.92	5	0.000449165	99720.5	44.7909	498509	7.15099e+06	71.7104
15-19	756.33	2.84159e+06	0.000266165	2.87	5	0.00133007	99675.7	132.576	498096	6.65248e+06	66.7413
20-24	1440.65	3.01277e+06	0.00047818	2.57	5	0.00238813	99543.1	237.722	497138	6.15439e+06	61.8264
25-29	1527.68	3.03389e+06	0.000503538	2.52	5	0.00251455	99305.4	249.708	495908	5.65725e+06	56.9682
30-34	1838.81	3.1832e+06	0.000577661	2.61	5	0.00288432	99055.7	285.709	494596	5.16134e+06	52.1055
35-39	2773.21	3.62465e+06	0.000765098	2.61	5	0.00381851	98770	377.154	492948	4.66675e+06	47.2486
40-44	4444.95	4.08558e+06	0.00108796	2.66	5	0.00542599	98392.8	533.879	490715	4.1738e+06	42.4197
45-49	8715.84	4.8654e+06	0.00179139	2.72	5	0.00892053	97858.9	872.954	487304	3.68308e+06	37.6367
50-54	13505.9	4.50136e+06	0.00300041	2.7	5	0.0148992	96986	1445.02	481606	3.19578e+06	32.9509
55-59	18674.2	3.88038e+06	0.00481247	2.67	5	0.0237955	95541	2273.45	472408	2.71417e+06	28.4085
60-64	27734.2	3.61623e+06	0.00766936	2.67	5	0.0376736	93267.5	3513.72	458151	2.24177e+06	24.0359
65-69	48378.3	3.82484e+06	0.0126484	2.68	5	0.0614393	89753.8	5514.41	435976	1.78361e+06	19.8723
70-74	93094	4.49387e+06	0.0207158	2.65	5	0.0987705	84239.4	8320.37	401644	1.34764e+06	15.9977
75-79	102293	3.02998e+06	0.0337603	2.67	5	0.156492	75919	11880.7	351913	945995	12.4606
80-84	132151	2.28436e+06	0.0578505	2.62	5	0.254247	64038.3	16281.5	281442	594082	9.27698
85-89	144491	1.36482e+06	0.105868	2.53	5	0.419613	47756.8	20039.4	189287	312640	6.54652
90-94	97769.1	516714	0.189213	2.32	5	0.627743	27717.4	17399.4	91956.6	123354	4.45041
95-99	32307.2	105850	0.305218	2.05	5	0.80304	10318	8285.76	27147	31397.3	3.04296
100-104	4514	9602.67	0.470078	1.73	5	0.926388	2032.24	1882.64	4004.95	4250.27	2.09143
105-109	270.11	446.26	0.605275	1.44	5	0.959299	149.598	143.509	237.097	245.317	1.63984
110+	5	4.76	1.05042	1.35	1	1	6.08884	6.08884	8.21993	8.21993	1.35

## Sheet: Table.S5.lft2020.male
Table S5: Life table Male 2020
Age	Death	ETR	mx	ax	w	qx	lx	dx	Lx	Tx	Ex
0	800.38	428260	0.00186891	0.22	1	0.00186619	100000	186.619	99854.4	8.16068e+06	81.6068
1-4	275.14	1.88446e+06	0.000146004	1.53	4	0.000583807	99813.4	58.2717	399110	8.06082e+06	80.7589
5-9	151.1	2.58506e+06	5.84513e-05	2.5	5	0.000292214	99755.1	29.1498	498703	7.66171e+06	76.8052
10-14	246.12	2.7238e+06	9.0359e-05	2.93	5	0.000451711	99726	45.0473	498537	7.16301e+06	71.8269
15-19	816.39	2.89962e+06	0.000281551	2.89	5	0.00140692	99680.9	140.243	498109	6.66447e+06	66.8581
20-24	1485.7	3.0195e+06	0.000492035	2.58	5	0.00245725	99540.7	244.596	497111	6.16636e+06	61.9482
25-29	1491.71	3.03532e+06	0.00049145	2.51	5	0.00245425	99296.1	243.697	495874	5.66925e+06	57.0944
30-34	1961.94	3266535	0.000600618	2.65	5	0.00299886	99052.4	297.044	494564	5.17338e+06	52.2287
35-39	2764.32	3.69397e+06	0.000748333	2.59	5	0.00373493	98755.3	368.844	492888	4.67882e+06	47.3779
40-44	4822.27	4.23837e+06	0.00113777	2.68	5	0.00567385	98386.5	558.231	490637	4.18593e+06	42.5458
45-49	8898.21	4.9159e+06	0.00181009	2.67	5	0.00901243	97828.3	881.67	487087	3.69529e+06	37.7732
50-54	12693	4.30835e+06	0.00294614	2.67	5	0.0146303	96946.6	1418.36	481428	3.2082e+06	33.0925
55-59	18502.8	3.88016e+06	0.00476856	2.68	5	0.0235819	95528.2	2252.74	472415	2.72678e+06	28.5442
60-64	28059.3	3.64367e+06	0.00770083	2.69	5	0.0378312	93275.5	3528.72	458226	2.25436e+06	24.1688
65-69	50993.2	4.01564e+06	0.0126986	2.68	5	0.0616762	89746.8	5535.24	435892	1.79613e+06	20.0134
70-74	84928.3	4.2847e+06	0.0198213	2.62	5	0.0946417	84211.5	7969.93	402089	1.36024e+06	16.1527
75-79	104427	3.13757e+06	0.033283	2.62	5	0.1542	76241.6	11756.5	353228	958153	12.5673
80-84	125935	2.20987e+06	0.0569873	2.63	5	0.251032	64485.1	16187.8	284061	604926	9.38085
85-89	135923	1.30122e+06	0.104458	2.55	5	0.415862	48297.3	20085	192278	320865	6.64354
90-94	89954.6	489482	0.183775	2.33	5	0.616414	28212.3	17390.5	94628.9	128587	4.55783
95-99	27484	93378.6	0.294329	2.06	5	0.788947	10821.8	8537.85	29007.9	33957.9	3.13791
100-104	3937.88	8772.07	0.448911	1.74	5	0.911143	2283.98	2081.03	4635.73	4950.03	2.16729
105-109	272.13	422.5	0.644095	1.45	5	0.979899	202.947	198.868	308.756	314.304	1.5487
110+	10	3.77	2.65252	1.36	1	1	4.07945	4.07945	5.54805	5.54805	1.36

## Sheet: Table.S6.lft2019.male
Table S6: Life table Male 2019
Age	Death	ETR	mx	ax	w	qx	lx	dx	Lx	Tx	Ex
0	892.46	452183	0.00197367	0.22	1	0.00197064	100000	197.064	99846.3	8.14058e+06	81.4058
1-4	337.17	1.94861e+06	0.000173031	1.57	4	0.000691832	99802.9	69.0468	399044	8.04074e+06	80.5661
5-9	209.1	2.61276e+06	8.00303e-05	2.52	5	0.000400072	99733.9	39.9008	498570	7.64169e+06	76.6208
10-14	236.11	2.73333e+06	8.63818e-05	2.77	5	0.000431826	99694	43.0504	498374	7.14312e+06	71.6505
15-19	771.41	2.94703e+06	0.000261759	2.92	5	0.00130808	99650.9	130.352	497984	6.64475e+06	66.6802
20-24	1430.73	3.04381e+06	0.000470045	2.52	5	0.00234749	99520.6	233.624	497024	6.14676e+06	61.7637
25-29	1372.71	3.02989e+06	0.000453056	2.61	5	0.00226283	99287	224.67	495898	5.64974e+06	56.9032
30-34	1962	3.36112e+06	0.000583735	2.54	5	0.00291449	99062.3	288.716	494601	5.15384e+06	52.0263
35-39	2852.45	3.76509e+06	0.000757604	2.66	5	0.00378132	98773.6	373.494	492994	4.65924e+06	47.1709
40-44	4891.47	4.40582e+06	0.00111023	2.65	5	0.0055367	98400.1	544.812	490720	4.16625e+06	42.3399
45-49	8806.48	4.88336e+06	0.00180337	2.71	5	0.00897974	97855.3	878.715	487264	3.67553e+06	37.5609
50-54	12652.4	4231744	0.00298988	2.69	5	0.0148469	96976.6	1439.8	481557	3.18826e+06	32.8766
55-59	18283.3	3.79112e+06	0.00482265	2.69	5	0.0238476	95536.8	2278.32	472421	2.70671e+06	28.3316
60-64	29225.8	3.69089e+06	0.00791836	2.67	5	0.0388746	93258.4	3625.38	457845	2.23429e+06	23.958
65-69	55268.1	4.26238e+06	0.0129665	2.68	5	0.062939	89633.1	5641.41	435077	1.77644e+06	19.819
70-74	80620.9	4.03011e+06	0.0200047	2.64	5	0.095514	83991.6	8022.38	401025	1.34136e+06	15.9702
75-79	105186	3.15377e+06	0.0333525	2.62	5	0.154499	75969.3	11737.2	351912	940338	12.3779
80-84	128573	2.17621e+06	0.0590811	2.63	5	0.259123	64232.1	16644	281714	588427	9.16094
85-89	135464	1.24256e+06	0.10902	2.53	5	0.429456	47588.1	20437	187461	306712	6.44515
90-94	88469.9	460304	0.192199	2.32	5	0.63428	27151.1	17221.4	89602.2	119251	4.39213
95-99	25846.1	82665.9	0.312657	2.03	5	0.810584	9929.69	8048.86	25743.4	29649	2.9859
100-104	3777.93	8049.19	0.469355	1.71	5	0.92241	1880.84	1734.9	3696.36	3905.67	2.07656
105-109	284.14	407.64	0.697037	1.42	5	0.99708	145.934	145.508	208.752	209.315	1.43431
110+	7	6.17	1.13452	1.32	1	1	0.426189	0.426189	0.56257	0.56257	1.32

## Sheet: Table.S7.lft2021.female
Table S7: Life table Female 2021
Age	Death	ETR	mx	ax	w	qx	lx	dx	Lx	Tx	Ex
0	637.09	392336	0.00162384	0.22	1	0.00162178	100000	162.178	99873.5	8.76072e+06	87.6072
1-4	228.02	1.72718e+06	0.000132019	1.55	4	0.000527904	99837.8	52.7048	399222	8.66085e+06	86.7492
5-9	136	2.4288e+06	5.59947e-05	2.42	5	0.000279933	99785.1	27.9331	498854	8.26163e+06	82.7942
10-14	197.01	2.58291e+06	7.62744e-05	2.95	5	0.000381312	99757.2	38.0386	498708	7.76277e+06	77.8167
15-19	448.08	2.69567e+06	0.000166222	2.69	5	0.00083079	99719.1	82.8457	498404	7.26407e+06	72.8452
20-24	743.1	2.89405e+06	0.000256768	2.51	5	0.00128302	99636.3	127.836	497863	6.76566e+06	67.9036
25-29	795.1	2.91194e+06	0.000273048	2.59	5	0.00136434	99508.5	135.763	497215	6.2678e+06	62.9876
30-34	1025.13	3.06001e+06	0.000335008	2.66	5	0.00167373	99372.7	166.323	496474	5.77058e+06	58.0701
35-39	1521.22	3.50124e+06	0.00043448	2.65	5	0.00217018	99206.4	215.296	495526	5.27411e+06	53.163
40-44	2711.38	3.94413e+06	0.000687447	2.68	5	0.00343176	98991.1	339.714	494167	4.77858e+06	48.2729
45-49	4965.72	4.71399e+06	0.0010534	2.69	5	0.00525421	98651.4	518.335	492059	4.28442e+06	43.4299
50-54	7449.07	4.40548e+06	0.00169086	2.65	5	0.00842086	98133	826.364	488723	3.79236e+06	38.645
55-59	9130.32	3.86133e+06	0.00236456	2.61	5	0.0117563	97306.7	1143.97	483799	3.30363e+06	33.9507
60-64	12373.8	3.6881e+06	0.00335506	2.66	5	0.0166446	96162.7	1600.59	477068	2.81983e+06	29.3236
65-69	21172.1	4.04219e+06	0.00523777	2.69	5	0.0258758	94562.1	2446.87	467158	2.34277e+06	24.7749
70-74	42769.2	5.02618e+06	0.00850929	2.71	5	0.0417332	92115.2	3844.27	451773	1.87561e+06	20.3615
75-79	56631.2	3.76928e+06	0.0150244	2.73	5	0.0726445	88271	6412.4	426799	1.42383e+06	16.1303
80-84	93105.5	3223032	0.0288876	2.72	5	0.135512	81858.6	11092.9	384001	997035	12.18
85-89	147958	2.45421e+06	0.0602876	2.67	5	0.26431	70765.7	18704.1	310248	613034	8.66287
90-94	166481	1.32892e+06	0.125275	2.52	5	0.477901	52061.6	24880.3	198605	302786	5.81592
95-99	101757	445765	0.228275	2.26	5	0.702179	27181.3	19086.1	83610.4	104182	3.83284
100-104	26551.9	70591.7	0.376133	1.89	5	0.866756	8095.15	7016.52	18654.4	20571.1	2.54116
105-109	2821.42	5072.05	0.556268	1.53	5	0.949182	1078.63	1023.82	1840.51	1916.7	1.77698
110+	106.01	154.86	0.684554	1.39	1	1	54.8139	54.8139	76.1914	76.1914	1.39

## Sheet: Table.S8.lft2020.female
Table S8: Life table Female 2020
Age	Death	ETR	mx	ax	w	qx	lx	dx	Lx	Tx	Ex
0	712.11	408864	0.00174168	0.22	1	0.00173932	100000	173.932	99864.3	8.7759e+06	87.759
1-4	192.02	1.79625e+06	0.000106901	1.59	4	0.000427493	99826.1	42.6749	399201	8.67604e+06	86.9115
5-9	155	2.46222e+06	6.29513e-05	2.37	5	0.000314704	99783.4	31.4023	498834	8.27684e+06	82.948
10-14	180	2.59015e+06	6.94941e-05	2.76	5	0.000347417	99752	34.6555	498682	7.778e+06	77.9734
15-19	446.07	2.75258e+06	0.000162055	2.74	5	0.00080998	99717.3	80.769	498404	7.27932e+06	72.9995
20-24	695.1	2.90135e+06	0.000239578	2.56	5	0.00119719	99636.6	119.284	497892	6.78091e+06	68.0565
25-29	757.1	2.91085e+06	0.000260096	2.55	5	0.00129965	99517.3	129.338	497270	6.28302e+06	63.135
30-34	941.13	3.14085e+06	0.000299642	2.64	5	0.00149715	99387.9	148.799	496589	5.78575e+06	58.2138
35-39	1633.26	3.56944e+06	0.000457568	2.64	5	0.00228537	99239.1	226.798	495660	5.28916e+06	53.2972
40-44	2858.46	4.09251e+06	0.000698461	2.65	5	0.00348658	99012.3	345.215	494250	4.7935e+06	48.4132
45-49	5217.79	4.76558e+06	0.00109489	2.68	5	0.00546059	98667.1	538.781	492086	4.29925e+06	43.5733
50-54	7126.1	4.22323e+06	0.00168736	2.63	5	0.00840318	98128.4	824.59	488687	3.80717e+06	38.7978
55-59	9028.38	3.86764e+06	0.00233434	2.63	5	0.0116075	97303.8	1129.45	483842	3.31848e+06	34.1043
60-64	12469.9	3.72e+06	0.00335214	2.67	5	0.0166308	96174.3	1599.45	477145	2.83464e+06	29.474
65-69	22004.4	4.2541e+06	0.00517251	2.68	5	0.0255559	94574.9	2416.95	467267	2.35749e+06	24.9273
70-74	39217.1	4.79756e+06	0.00817438	2.66	5	0.0401048	92157.9	3695.97	452141	1.89023e+06	20.5107
75-79	57766.9	3.90739e+06	0.014784	2.71	5	0.0714995	88461.9	6324.98	427825	1.43809e+06	16.2565
80-84	90665	3.14505e+06	0.0288279	2.73	5	0.135286	82137	11112	385461	1.01026e+06	12.2997
85-89	140670	2.37782e+06	0.059159	2.69	5	0.260232	71025	18483	312429	624799	8.7969
90-94	155328	1.28222e+06	0.12114	2.53	5	0.466205	52542	24495.3	202206	312370	5.94516
95-99	91922.2	416044	0.220944	2.27	5	0.689081	28046.6	19326.4	87472.1	110164	3.92789
100-104	23368.6	63496.6	0.368029	1.92	5	0.862489	8720.23	7521.1	20436.1	22691.9	2.60222
105-109	2479.38	4747.58	0.522241	1.55	5	0.931997	1199.13	1117.58	2139.97	2255.77	1.88118
110+	87	133.14	0.653447	1.42	1	1	81.5445	81.5445	115.793	115.793	1.42

## Sheet: Table.S9.lft2019.female
Table S9: Life table Female 2019
Age	Death	ETR	mx	ax	w	qx	lx	dx	Lx	Tx	Ex
0	762.14	430591	0.00176998	0.22	1	0.00176754	100000	176.754	99862.1	8.74701e+06	87.4701
1-4	328.06	1.85541e+06	0.000176813	1.54	4	0.000706944	99823.2	70.5695	399119	8.64715e+06	86.6246
5-9	170.01	2.48833e+06	6.8323e-05	2.18	5	0.000341549	99752.7	34.0704	498667	8.24803e+06	82.6848
10-14	190.01	2.60037e+06	7.30704e-05	2.79	5	0.000365293	99718.6	36.4265	498513	7.74937e+06	77.7123
15-19	406.1	2.8005e+06	0.00014501	2.71	5	0.000724809	99682.2	72.2506	498245	7.25085e+06	72.7397
20-24	612.1	2.91868e+06	0.000209718	2.53	5	0.00104805	99609.9	104.396	497792	6.75261e+06	67.7905
25-29	683.11	2.90453e+06	0.000235188	2.56	5	0.00117526	99505.5	116.945	497242	6.25482e+06	62.859
30-34	1017.19	3.23577e+06	0.000314358	2.65	5	0.00157063	99388.6	156.102	496576	5.75757e+06	57.9299
35-39	1626.31	3.63882e+06	0.000446933	2.59	5	0.00223226	99232.5	221.513	495629	5.261e+06	53.0169
40-44	2924.55	4.25657e+06	0.000687067	2.66	5	0.00342982	99011	339.59	494260	4.76537e+06	48.1297
45-49	5222.96	4.74022e+06	0.00110184	2.7	5	0.00549527	98671.4	542.226	492110	4.27111e+06	43.2862
50-54	6900.29	4.15866e+06	0.00165926	2.64	5	0.00826393	98129.2	810.932	488732	3.779e+06	38.5105
55-59	9117.69	3.78386e+06	0.00240962	2.68	5	0.0119811	97318.2	1165.98	483886	3.29027e+06	33.8094
60-64	12936.4	3.77107e+06	0.00343043	2.64	5	0.0170144	96152.2	1635.97	476900	2.80638e+06	29.1868
65-69	24254.5	4.53129e+06	0.00535268	2.68	5	0.0264351	94516.3	2498.55	466785	2.32948e+06	24.6463
70-74	37392.9	4.53156e+06	0.00825168	2.67	5	0.0404801	92017.7	3724.89	451410	1.8627e+06	20.2428
75-79	58645.9	3.91886e+06	0.014965	2.71	5	0.0723459	88292.8	6387.62	426837	1.41129e+06	15.9842
80-84	93842.4	3.12349e+06	0.0300441	2.73	5	0.140629	81905.2	11518.3	383380	984450	12.0194
85-89	143642	2.30522e+06	0.0623116	2.68	5	0.272207	70386.9	19159.8	307484	601070	8.53951
90-94	157121	1.23141e+06	0.127594	2.51	5	0.484152	51227.1	24801.7	194379	293586	5.73107
95-99	90855.9	387572	0.234423	2.25	5	0.712678	26425.4	18832.8	80336.9	99206.9	3.75422
100-104	22510.2	58123.8	0.38728	1.88	5	0.876868	7592.61	6657.71	17191	18870.1	2.48532
105-109	2407.45	4386.37	0.548848	1.51	5	0.941265	934.893	879.983	1603.33	1679.1	1.79604
110+	103	124.66	0.826247	1.38	1	1	54.9106	54.9106	75.7767	75.7767	1.38

## Sheet: Table.S10.LEchange.pref.YO
Table S10: Life expectancy with changes in each prefecture, 2019-2021
	TOTAL						MALE						FEMALE						FEMALE-MALE
Prefecture	2019	2020	2021	∆2019-20	∆2020-21		2019	2020	2021	∆2019-20	∆2020-21		2019	2020	2021	∆2019-20	∆2020-21		2019	2020	2021	∆2019-20	∆2020-21
Hokkaido	84.0828	84.3363	83.9797	0.253565	-0.356692		80.8488	81.1135	80.807	0.264739	-0.306493		87.0665	87.2985	86.9168	0.231945	-0.381733		6.21774	6.18495	6.10971	-0.0327942	-0.0752401
Aomori	82.622	83.1161	82.9498	0.494058	-0.166314		78.9601	79.4523	79.4199	0.49219	-0.0323411		86.1189	86.5968	86.3155	0.477913	-0.281287		7.15881	7.14454	6.89559	-0.0142766	-0.248946
Iwate	83.5106	84.128	84.1509	0.617397	0.0229237		80.1606	80.9091	80.9213	0.748486	0.0122226		86.7895	87.2012	87.2831	0.411618	0.0819143		6.62892	6.29205	6.36174	-0.336867	0.0696918
Miyagi	84.4362	84.8697	84.7309	0.433545	-0.138816		81.3486	81.9213	81.9177	0.572688	-0.0036252		87.4329	87.6958	87.4197	0.26296	-0.276175		6.08428	5.77455	5.502	-0.309728	-0.27255
Akita	83.7451	84.0122	83.9561	0.267073	-0.0560245		80.4941	80.4293	80.5616	-0.0647742	0.132244		86.7797	87.4219	87.2043	0.642249	-0.217624		6.28557	6.99259	6.64273	0.707023	-0.349869
Yamagata	84.3484	84.4056	84.5473	0.0571663	0.141662		81.1987	81.5139	81.4992	0.315157	-0.0146945		87.4343	87.1796	87.5419	-0.254701	0.3623		6.23556	5.6657	6.0427	-0.569858	0.376995
Fukushima	83.6094	83.9584	83.5773	0.348938	-0.381057		80.4472	80.8868	80.5589	0.439592	-0.32791		86.8198	87.0402	86.6188	0.220415	-0.421405		6.37254	6.15336	6.05987	-0.219177	-0.0934943
Ibaraki	83.6632	83.9468	84.0021	0.28361	0.0553146		80.7086	80.9202	81.0747	0.2116	0.154431		86.7251	87.0979	87.049	0.372798	-0.0489487		6.01646	6.17766	5.97428	0.161198	-0.20338
Tochigi	83.6906	84.1517	83.9613	0.461134	-0.190447		80.7936	81.2277	80.9947	0.434065	-0.232949		86.622	87.0979	87.0154	0.47588	-0.0825053		5.82836	5.87018	6.02062	0.0418157	0.150444
Gunma	84.1108	84.3111	83.9717	0.200265	-0.339452		81.2704	81.3799	80.7519	0.109527	-0.628021		86.9593	87.2728	87.3326	0.313454	0.0598185		5.68897	5.89289	6.58073	0.203927	0.68784
Saitama	84.2851	84.4213	84.3098	0.136203	-0.111436		81.3868	81.5352	81.4127	0.148329	-0.122516		87.2243	87.3548	87.2903	0.130501	-0.0644395		5.83742	5.81959	5.87767	-0.0178287	0.0580762
Chiba	84.287	84.5812	84.4798	0.294277	-0.101414		81.3158	81.5739	81.4876	0.258011	-0.0862503		87.3154	87.6518	87.5534	0.336356	-0.0983779		5.99957	6.07791	6.06578	0.0783452	-0.0121275
Tokyo	84.8244	85.0088	84.8245	0.184373	-0.184329		81.7393	81.9005	81.7279	0.161209	-0.172584		87.7997	88.0052	87.8393	0.205541	-0.16586		6.06039	6.10472	6.11144	0.0443326	0.00672387
Kanagawa	84.8969	85.0809	84.9483	0.184046	-0.132577		82.0013	82.1014	82.0214	0.100149	-0.080077		87.7562	88.035	87.8759	0.27876	-0.159129		5.75493	5.93354	5.85449	0.178611	-0.0790522
Niigata	84.2809	84.7054	84.4145	0.424458	-0.290858		81.08	81.536	81.2823	0.455977	-0.253701		87.4447	87.8087	87.5233	0.364016	-0.285403		6.36469	6.27273	6.24102	-0.0919608	-0.0317021
Toyama	84.8533	85.2017	84.8073	0.348337	-0.394344		81.6411	82.0758	81.5662	0.43474	-0.50963		87.8875	88.13	87.9187	0.242518	-0.211319		6.24642	6.05419	6.3525	-0.192223	0.298311
Ishikawa	84.9802	85.261	85.2762	0.280823	0.0151622		81.9469	81.9843	82.1545	0.0374137	0.170117		87.7825	88.3566	88.2218	0.574049	-0.134792		5.8356	6.37224	6.06733	0.536635	-0.304908
Fukui	84.8571	84.9468	85.1817	0.0896263	0.234978		81.815	81.9118	82.3294	0.0968494	0.417611		87.7992	87.882	87.904	0.0828533	0.0219587		5.98421	5.97022	5.57457	-0.0139961	-0.395652
Yamanashi	84.4974	84.9951	84.9896	0.497725	-0.00554792		81.3447	81.7624	82.0245	0.417637	0.262142		87.6704	88.2252	87.9473	0.554785	-0.277838		6.32566	6.46281	5.92283	0.137148	-0.53998
Nagano	85.3408	85.5205	85.6616	0.17965	0.141175		82.5687	82.5672	82.9406	-0.00158286	0.373473		88.0327	88.4045	88.3052	0.371757	-0.0993143		5.46399	5.83733	5.36454	0.37334	-0.472787
Gifu	84.5037	85.0557	84.7161	0.551999	-0.339615		81.6268	82.2653	81.8148	0.638506	-0.450531		87.2783	87.7201	87.5557	0.441834	-0.164363		5.65148	5.45481	5.74098	-0.196672	0.286168
Shizuoka	84.3897	84.5687	84.6651	0.179011	0.0964101		81.4484	81.6074	81.6999	0.159047	0.0924814		87.3008	87.5004	87.6266	0.199651	0.126132		5.85239	5.89299	5.92664	0.0406039	0.0336511
Aichi	84.5607	84.7232	84.6614	0.162449	-0.0617466		81.7326	81.7871	81.789	0.054503	0.00197477		87.3716	87.6535	87.5449	0.281898	-0.108589		5.63904	5.86643	5.75587	0.227395	-0.110564
Mie	84.6161	84.6917	84.7124	0.0756118	0.0206963		81.5168	81.7296	81.7965	0.21272	0.0669383		87.6679	87.5767	87.5716	-0.0911416	-0.00515834		6.15103	5.84717	5.77508	-0.303861	-0.0720966
Shiga	85.3492	85.7007	85.5912	0.351504	-0.109453		82.5624	82.8935	82.7372	0.331115	-0.156328		88.0479	88.3968	88.3748	0.348951	-0.0220563		5.48548	5.50331	5.63759	0.0178363	0.134272
Kyoto	85.2163	85.5393	85.3824	0.322957	-0.156925		82.1759	82.3463	82.2656	0.170375	-0.0807141		88.0201	88.5043	88.3055	0.484262	-0.198798		5.84415	6.15804	6.03996	0.313887	-0.118084
Osaka	84.1314	84.2604	84.0355	0.128961	-0.224869		80.8552	80.9126	80.6722	0.0574559	-0.240461		87.2928	87.5048	87.3356	0.211922	-0.169199		6.43765	6.59211	6.66337	0.154466	0.0712613
Hyogo	84.9161	85.0376	84.8063	0.121473	-0.23136		81.7857	81.8113	81.6064	0.0256495	-0.204968		87.8424	88.0737	87.8421	0.231234	-0.231603		6.05674	6.26232	6.23569	0.205584	-0.0266353
Nara	85.2358	85.4585	85.1889	0.222749	-0.269562		82.2995	82.4783	82.444	0.178774	-0.0342936		87.9501	88.217	87.7348	0.266893	-0.482154		5.65059	5.73871	5.29085	0.0881192	-0.447861
Wakayama	84.1552	84.4862	84.2774	0.331032	-0.208808		80.8325	81.2316	81.0194	0.399056	-0.21214		87.3064	87.5273	87.3495	0.220847	-0.177751		6.47388	6.29567	6.33006	-0.17821	0.0343899
Tottori	84.155	85.3242	84.7522	1.16923	-0.572		81.0452	81.7583	81.2573	0.713017	-0.50096		87.0295	88.7064	88.103	1.67697	-0.603477		5.98423	6.94818	6.84566	0.963951	-0.102518
Shimane	84.8928	84.9686	85.0774	0.075817	0.108794		81.4704	81.6966	81.7531	0.226174	0.0565196		88.2227	88.1418	88.3284	-0.0809193	0.186632		6.75233	6.44524	6.57535	-0.307093	0.130112
Okayama	85.0169	85.3774	85.1444	0.360484	-0.233038		81.7706	82.0806	81.9181	0.309976	-0.162426		88.1095	88.5235	88.2576	0.413944	-0.265921		6.33893	6.4429	6.33941	0.103968	-0.103495
Hiroshima	84.8693	85.3825	85.1906	0.513226	-0.19195		81.7336	82.2038	81.9681	0.470223	-0.235771		87.8417	88.3902	88.293	0.548444	-0.0971328		6.10813	6.18635	6.32499	0.0782217	0.138638
Yamaguchi	84.1897	84.6275	84.3883	0.437806	-0.239207		81.0571	81.1766	81.1929	0.119485	0.0163282		87.0805	87.877	87.3799	0.796596	-0.497117		6.02338	6.70049	6.18704	0.677111	-0.513445
Tokushima	84.387	84.4239	84.4542	0.0369213	0.0302767		81.4176	81.3303	81.067	-0.0873353	-0.263278		87.1741	87.3524	87.7703	0.178313	0.417937		5.75642	6.02207	6.70329	0.265648	0.681215
Kagawa	84.6448	84.5791	84.8054	-0.0657758	0.226352		81.7142	81.4891	81.532	-0.22512	0.0429209		87.4428	87.5757	88.0096	0.132855	0.433882		5.72861	6.08659	6.47755	0.357975	0.390961
Ehime	84.1667	84.554	84.2981	0.38729	-0.255959		80.9254	81.4802	80.9809	0.554834	-0.499272		87.1966	87.3834	87.4498	0.186747	0.066406		6.27128	5.90319	6.46887	-0.368087	0.565678
Kochi	84.1476	84.6056	84.4673	0.457945	-0.138299		80.5516	81.1673	80.6813	0.615705	-0.48598		87.5739	87.8444	88.1461	0.270459	0.30173		7.02235	6.6771	7.46481	-0.345246	0.787711
Fukuoka	84.5394	84.9274	84.6607	0.388017	-0.266767		81.2424	81.5828	81.3167	0.340404	-0.266163		87.4977	87.9316	87.7102	0.43384	-0.221385		6.25531	6.34875	6.39353	0.0934359	0.0447783
Saga	84.5696	84.8906	84.7319	0.320987	-0.158606		81.3117	81.4206	81.5094	0.108929	0.088733		87.5606	88.1209	87.684	0.56028	-0.436902		6.24889	6.70024	6.17461	0.451352	-0.525635
Nagasaki	84.3749	84.3412	84.3359	-0.0336605	-0.00526862		81.0533	80.9383	81.074	-0.115061	0.135718		87.4307	87.4862	87.3704	0.0554896	-0.115855		6.3774	6.54795	6.29638	0.17055	-0.251573
Kumamoto	85.0332	85.3765	85.1829	0.343219	-0.193562		81.7864	81.9804	81.9634	0.194035	-0.017068		88.0184	88.5227	88.1668	0.504266	-0.355883		6.23198	6.54221	6.20339	0.310231	-0.338815
Oita	85.0513	85.2275	84.9476	0.176161	-0.279839		81.9628	81.8601	81.9073	-0.102673	0.0472498		87.8882	88.3799	87.7515	0.491709	-0.628389		5.92541	6.5198	5.84416	0.594382	-0.675638
Miyazaki	84.623	84.3729	84.3995	-0.250109	0.0266505		81.3216	81.0891	81.048	-0.232497	-0.0411098		87.7012	87.469	87.5763	-0.23221	0.1073		6.37955	6.37984	6.52825	0.00028715	0.14841
Kagoshima	84.138	84.3663	84.4684	0.228292	0.102117		80.7374	80.983	81.165	0.245549	0.181995		87.3876	87.5918	87.644	0.204162	0.0522776		6.65018	6.6088	6.47908	-0.041387	-0.129717
Okinawa	84.3114	84.5437	83.9786	0.232283	-0.565116		80.7415	80.9885	80.5055	0.247057	-0.482975		87.9749	88.1713	87.5749	0.196345	-0.596397		7.23346	7.18275	7.06933	-0.050712	-0.113422

[truncated: 12 more sheets: Table.S11.decomp.age.2020.2021, Table.S12.decomp.age.2019.2020, Table.S13.decomp.cause, Table.S14.cause.2021.total, Table.S15.cause.2020.total, Table.S16.cause.2019.total, Table.S17.cause.2021.male, Table.S18.cause.2020.male, Table.S19.cause.2019.male, Table.S20.cause.2021.female, Table.S21.cause.2020.female, Table.S22.cause.2019.female]
